# Supplementary figures and images for: Identification of Novel Subtypes in Lung Adenocarcinoma: Evidence from Gene Set Variation Analysis in Tumor and Adjacent Nontumor Samples
Source: Hindawi journal article supplement (doi:10.1155/2022/2602812), 2022-01-19

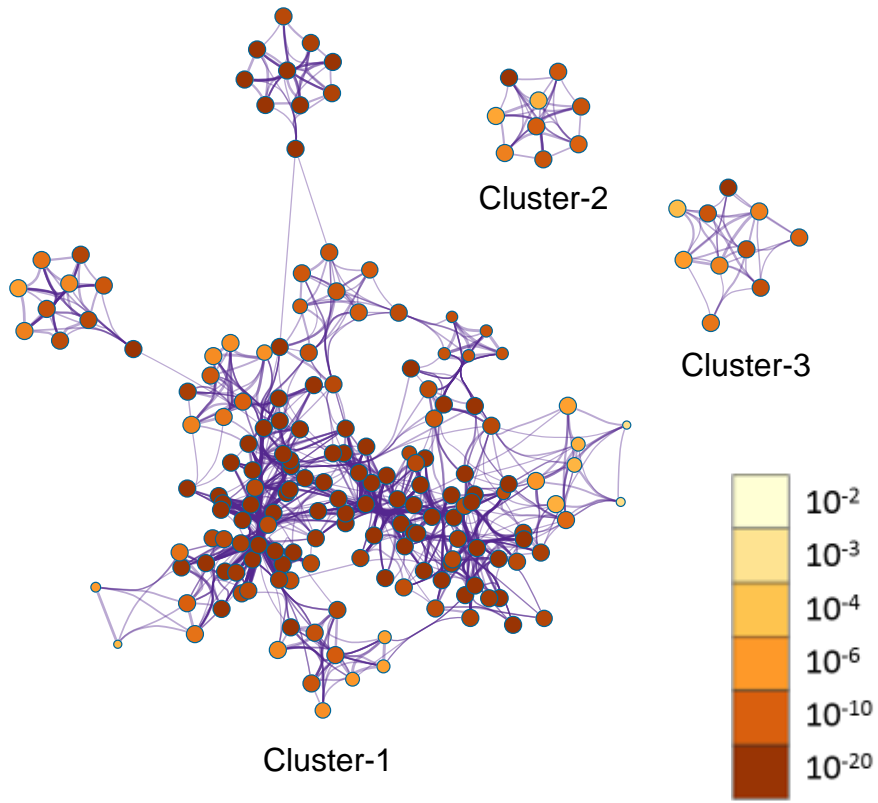

Supplement: f2 [file 2602812.f2.pdf]
